# Supplementary material for: NO 2 -initiated multiphase oxidation of SO 2 by O 2 on CaCO 3 particles
Source: Copernicus journal article supplement (doi:10.5194/acp-18-6679-2018), 2018-05-09
Supplement: Supplementary file 1 [file acp-18-6679-2018-supplement.pdf]

Supplement of Atmos. Chem. Phys., 18, 6679–6689, 2018  
<https://doi.org/10.5194/acp-18-6679-2018-supplement>  
© Author(s) 2018. This work is distributed under  
the Creative Commons Attribution 4.0 License.

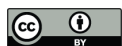

*Supplement of*

## **NO<sub>2</sub>-initiated multiphase oxidation of SO<sub>2</sub> by O<sub>2</sub> on CaCO<sub>3</sub> particles**

**Ting Yu et al.**

*Correspondence to:* Tong Zhu (tzhu@pku.edu.cn)

The copyright of individual parts of the supplement might differ from the CC BY 4.0 License.

## 10 **S1. Influence of gas phase diffusion on reactive uptake coefficients**

11 The Influence of the gas phase diffusion on reactive uptake coefficients was analyzed using the resistor  
12 model described by Davidovits et al. (2006) and the references therein.

$$13 \frac{1}{\gamma} = \frac{1}{\Gamma_{diff}} + \frac{1}{\alpha} + \frac{1}{\Gamma_{sat} + \Gamma_{rxn}} \quad (1)$$

14 where  $\Gamma_{diff}$  is the transport coefficient in the gas phase,  $1/\Gamma_{diff}$  is the resistance due to the diffusion in the  
15 gas phase. Similarly,  $1/\Gamma_{sat}$  and  $1/\Gamma_{rxn}$  are the resistance due to liquid phase saturation and liquid phase  
16 reaction, respectively.  $\alpha$  is the mass accommodation coefficient of  $\text{SO}_2$ .

17  $1/\Gamma_{diff}$  can be determined using the following equation:

$$18 \frac{1}{\Gamma_{diff}} = \frac{0.75 + 0.238Kn}{Kn(1 + Kn)} \quad (2)$$

19 where Kn is Knudsen number. Knudsen number is defined as

$$20 Kn = \frac{\lambda}{a} \quad (3)$$

21 where  $\lambda$  is the mean free path of a molecule in the gas phase and  $a$  is the radius of the particle.

22  $\lambda$  can be derived from

$$23 \lambda = \frac{3D_g}{c} \quad (4)$$

24 where  $D_g$  is the diffusion coefficient in the gas phase and  $c$  is the mean molecular velocity.

25  $c$  is determined by

$$26 c = \sqrt{\frac{8RT}{\pi M}} \quad (5)$$

27 where  $R$  is the gas constant,  $T$  is temperature, and  $M$  is the molecular mass of  $\text{SO}_2$ .

28  $1/\Gamma_{diff}$  was calculated to be 78 and  $1/\gamma$  was calculated to be  $\sim 8.3 \times 10^4$ .  $1/\Gamma_{diff}$  only accounted for <0.1%  
29 of  $1/\gamma$ . Therefore, the reactive uptake of  $\text{SO}_2$  in this study was not limited by gas phase diffusion.

30 The same conclusion can also be drawn by calculating the gas phase diffusion correction factor for a  
31 reactive uptake coefficient according to the method in Pöschl et al. (2007) (Equation 20 in their study,  
32 also shown as equation 6 below).

$$33 C_g = \frac{1}{1 + \gamma \frac{0.75}{Kn}} \quad (6)$$

34 where  $C_g$  is the gas phase diffusion correction factor for a reactive uptake coefficient.

35 **References**

- 36 Davidovits, P., Kolb, C. E., Williams, L. R., Jayne, J. T., and Worsnop, D. R.: Mass accommodation and  
37 chemical reactions at gas-liquid interfaces, *Chem. Rev.*, 106, 1323-1354, 10.1021/cr040366k, 2006.
- 38 Pöschl, U., Rudich, Y., and Ammann, M.: Kinetic model framework for aerosol and cloud surface chemistry and  
39 gas-particle interactions - Part 1: General equations, parameters, and terminology, *Atmos. Chem. Phys.*, 7,  
40 5989-6023, 2007.
- 41 Zhao, D., Song, X., Zhu, T., Zhang, Z., and Liu, Y.: Multiphase Reaction of SO<sub>2</sub> with NO<sub>2</sub> on CaCO<sub>3</sub> Particles.  
42 1. Oxidation of SO<sub>2</sub> by NO<sub>2</sub>, *Atmos. Chem. Phys. Discuss.*, 2017, 1-23, 10.5194/acp-2017-610, 2017.

43

44

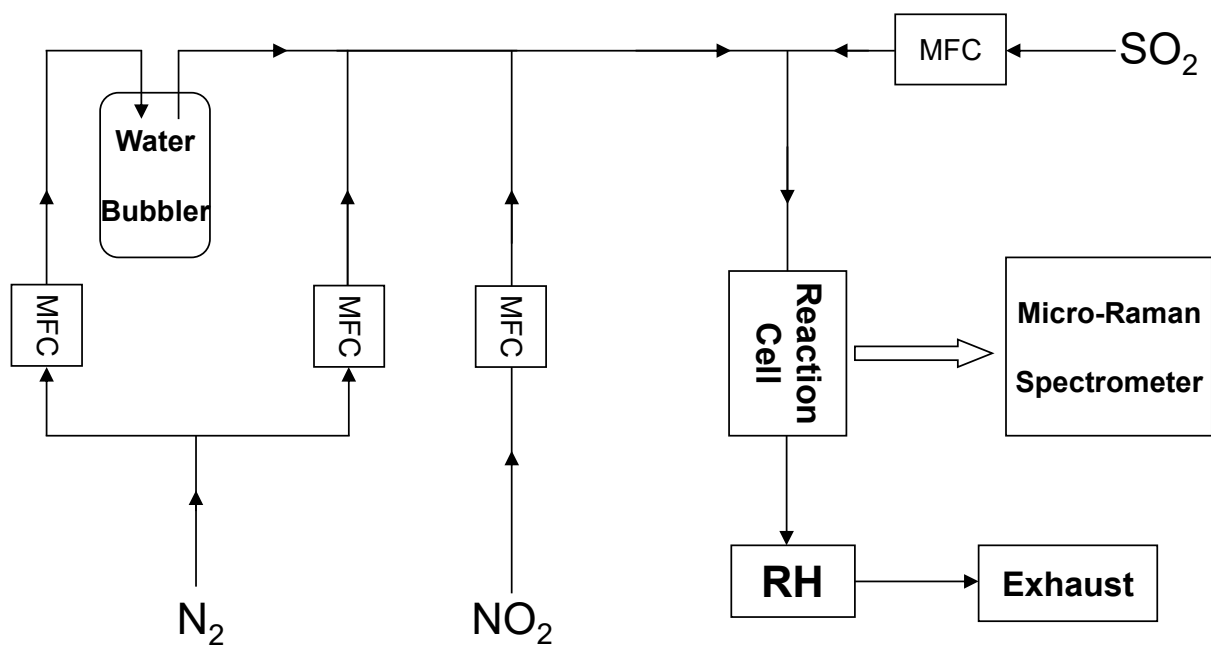

45

46 Figure S1. Schematic diagram of the experimental setup (Zhao et al., 2017). MFC: mass flow controller.

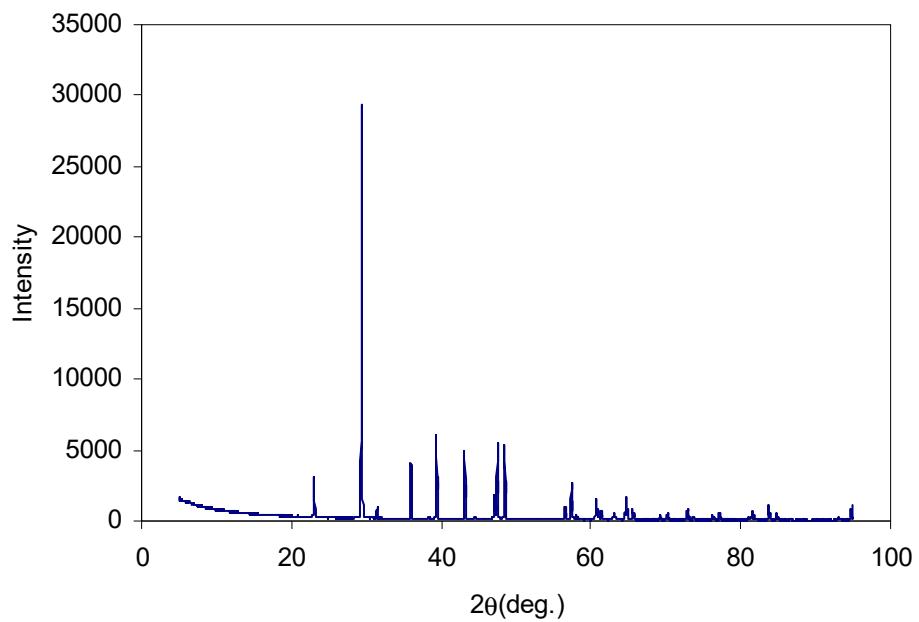

47

48

49

Figure S2. X-ray diffraction spectra of CaCO<sub>3</sub> particles.
